# Supplementary material
Source: Research Square preprint supplement (doi:10.21203/rs.3.rs-8853378/v1)
Supplement: Supplementary file 1 [file c14f01058d1bfd47af7c4caa.docx]

**Roteiro de Entrevista Semiestruturada: Moradores do MCMV**

**Introdução:**

Obrigado por falar comigo hoje. Este ainda é um bom momento para conversarmos? Nossa conversa deve durar entre 45 minutos e 1 hora. Está bem para você?

*[Se necessário, reagende conforme necessário para um momento em que a pessoa não esteja com pressa.]*

O objetivo desta entrevista é entender suas experiências morando em uma casa do MCMV e como isso afeta sua vida diária e saúde.

Antes de começarmos, precisamos apresentar o Termo de Consentimento Livre e Esclarecido (TCLE). Este documento explica os objetivos do estudo, como as informações serão utilizadas, que sua participação é voluntária, que você pode parar a entrevista a qualquer momento, e que suas respostas são confidenciais, seu nome e endereço não serão identificados em nenhum relatório. Por favor, leia com calma o termo e, se concordar, assine para registrarmos sua autorização. Se preferir, posso ler o termo para você ou esclarecer qualquer parte que não fique clara.

*[Entrevistador entrega o TCLE, aguarda a leitura e esclarece dúvidas.]*

Você gostaria de participar da entrevista e autorizar o uso das suas respostas conforme explicado?

*[Se sim]: Ótimo, por favor, assine o termo aqui na folha..*

*[Se não]: Agradeça o tempo da pessoa e encerre a abordagem educadamente.*

Como mencionamos anteriormente, suas respostas hoje são confidenciais e não serão usadas de nenhuma forma para identificá-lo(a) ou identificar onde você mora.

Estamos conversando com moradores do MCMV para entender mais sobre suas experiências, desafios e oportunidades para melhorar a habitação e o bem-estar nas comunidades. Suas opiniões são valiosas para nos ajudar a formular recomendações para políticas habitacionais mais saudáveis e duradouras. Esta conversa é confidencial e você pode pular qualquer pergunta com a qual não se sinta confortável.

Gostaríamos de gravar esta entrevista para fins de anotação e transcrição, mas as gravações não serão usadas para nenhum outro propósito e serão destruídas assim que transcritas, dentro de até 6 meses. Está de acordo?

*[Se sim]: Obrigado. Vou iniciar a gravação agora.*

*[Se não]: Tudo bem, obrigado por me informar. Farei anotações por escrito então.*

Você tem alguma dúvida antes de começarmos?

1. **Fatores individuais**
   1. ***Onde você morava antes de ir morar na sua casa atual? E há quanto tempo mora na sua casa do MCMV?***

*Se possível, explore: “Você foi morar na sua casa atual logo depois que a casa ficou pronta ou comprou/alugou depois?”*

- 1. ***Você escolheu morar nesta casa ou foi a única disponível para você?***

*Se possível, explore: “Te deixaram escolher a casa e o local ou foi onde te colocaram?”*

*Se possível, explore: “Se você pôde escolher, o que fez você escolher essa casa ou lugar (estrutura, proximidade a espaços públicos, escolas, transporte)?”*

- 1. ***Você se sente seguro(a) no seu bairro? Por quê?***

*Se possível, explore: “Você se sente tranquilo(a) para andar no bairro de dia e de noite?”*

*Se possível, explore: “O seu bairro tem problemas com assaltos, brigas ou trânsito perigoso?”*

- 1. ***Como você costuma se locomover? A pé, de ônibus, bicicleta ou carro?***

*Se possível, explore: “Como você vai para o trabalho, escola ou mercado?”*

*Se possível, explore: “Tem ônibus ou outro transporte perto? Funciona bem?”*

*Se possível, explore: “Desde que se mudou para o MCMV, mudou o jeito de você se locomover (a pé, ônibus, moto, etc)?”*

*Se possível, explore: O tempo gasto para deslocamentos para a escola ou trabalho mudou após se mudar para o MCMV?*

- 1. ***Desde que você comecou a morar na sua casa atual, sua saúde mudou para melhor ou para pior?***

*Se possível, explore: “Você percebeu alguma coisa na saúde, tipo mais cansaço, estresse ou começou a se movimentar mais?”*

*Se possível, explore: “Seu bairro tem muito barulho, fumaça ou cheiro ruim? Isso te incomoda?”*

*Se possível, explore: “Tem posto ou unidade de saúde por perto? Você costuma ir lá?”*

1. **Relações sociais**
2. ***Como é a convivência entre as pessoas no seu condomínio ou bairro do MCMV?***

*Se possível, explore: “Você conversa com seus vizinhos com frequência? Participa de eventos ou grupos comunitários?”*

*Se possível, explore: “Existe algum lugar onde as pessoas costumam se reunir, como uma praça ou centro comunitário?”*

1. ***Alguém da sua vizinhança, amigos ou família te ajuda no dia a dia? Como?***

*Se possível, explore: “De que forma eles oferecem apoio? Por exemplo, levar as criancas para escola, ou acompanhar alguém no médico, ou ajudar com algum concerto em casa ou no carro?”*

1. ***Você participa de algum grupo ou atividade comunitária no bairro? Qual?***

*Se possível, explore: “O que vocês fazem nesse grupo? É alguma atividade de lazer, ajuda mútua, igreja ou arrecadação de dinheiro para algo?”*

1. **Comunidade**
2. ***Que coisas tem no seu bairro? Tipo pracinha, parquinho, escola ou posto de saúde?***

*Se possível, explore:“Tem algum lugar seguro onde as crianças brincam? Onde elas costumam brincar?”*

*Se possível, explore:“Tem posto de saúde perto da sua casa? Você ou sua família costumam ir lá?”*

*Se possível, explore:“Tem escola suficiente ou as crianças precisam ir para longe estudar?”*

*Se possível, explore:“Tem algum lugar onde as pessoas se juntam para festas ou reuniões do bairro?”*

*Se possível, explore*: *Você consegue chegar facilmente a estes locais (praças, parquinho, escola, etc.)? (considerando a possivel existencia barreiras físicas como rodovias, falta de calçadas).*

1. ***É fácil para você fazer compras ou encontrar trabalho perto da sua casa?***

*Se possível, explore: “Você precisa ir longe para fazer compras ou resolver outras coisas importantes?”*

*Se possível, explore: “Tem emprego no seu bairro ou a maioria do pessoal precisa sair para trabalhar em outro lugar?”*

*Se possível, explore: “Se você trabalha, como chega no trabalho? Demora muito?”*

*Se possível, explore: “O ônibus ou outro transporte que você usa é fácil de pegar e barato?”*

1. ***No seu bairro tem algum problema com o clima, tipo enchente, calor forte ou ar ruim?***

*Se possível, explore: “Você já viu problemas com chuvas fortes que causam enchente ou calor forte que atrapalha sair na rua?”*

*Se possível, explore: Como esses problemas afetam seu dia a dia?*

*Se possível, explore: “O que o pessoal faz quando tem esses problemas com o clima?”*

1. ***O que você gostaria que mudasse no seu bairro para sua vida ficar melhor?***

*Se possível, explore: “Se pudesse mudar só uma coisa no bairro, o que seria?”*

*Se possível, explore: “Tem algum serviço ou lugar que você acha que faz falta no seu bairro?”*

*Se possível, explore: “O que faria seu bairro ser um lugar melhor para você e sua’’’ família?”*

*Se possível, explore: Voce acha que o seu bairro tem arborização nas calcadas e áreas verdes, como pracas, o suficiente?*

1. **Infraestrutura e serviços do bairro**
2. ***As infraestruturas necessárias, como por exemplo, ruas, transporte, esgoto, luz, água e lixo, estão presentes e funcionam bem?***

*Se possível, explore: “O que funciona bem? O que funciona mal?”*

*Se possível, explore: “Você já teve que falar com a prefeitura ou outra autoridade ou empresa responsável para resolver problema com a casa ou com o bairro? Eles te ajudaram?”*

1. ***Alguém já te chamou ou perguntou sua opinião sobre mudanças ou melhorias no seu bairro?***

*Se possível, explore: “É fácil falar com a prefeitura ou quem cuida dessas coisas? Eles costumam responder ou ajudar?”*

1. **Clima**
2. ***O calor ou chuva fortes atrapalham as casas ou o bairro onde você mora?***

*Se possível, explore: “Você já viu o calor ou as enchentes atrapalharem as casas ou o bairro?”*

*Se possível, explore: “Sua casa fica fresca no verão e quentinha no frio? Se não, o que você faz para lidar com isso?”*

*Se possível, explore: “No seu bairro tem problemas como canos quebrados ou fios soltos que fazem mal para as pessoas ou para o meio ambiente?”*

1. ***Se sim, o que você acha que poderia ser feito na sua casa para ela aguentar melhor o calor, a chuva ou outros problemas relacionados ao clima?***

**Questionário de identificação e fatores sociais/individuais**

Antes de iniciarmos o gostaríamos de perguntar algumas características individuais, sociais e econômicas. Lembrando que todos os seus dados são confidenciais e só serão utilizados para pesquisa.

1. **Município que a entrevista foi realizada:**
2. **Qual o seu nome completo?**
3. **Qual a sua data de nascimento? ___/___/_____**
4. **Qual o seu gênero:**
5. Masculino
6. Feminino
7. Outro (Qual?)
8. Prefiro não dizer
9. **Qual a sua cor ou raça?**
10. Branca
11. Preta
12. Amarela
13. Parda
14. Indígena
15. Outra (Qual?)
16. Não sabe/não respondeu
17. **Qual é a sua situação conjugal?**
18. Casado no civil ou religioso
19. Em união conjugal estável ou vive junto
20. Solteiro
21. Desquitado, divorciado, separado
22. Viúvo
23. Não sabe/não respondeu
24. **Até que ano da escola o(a) Sr.(a) completou?**
25. Nunca frequentou, não sabe ler e escrever
26. Nunca frequentou, sabe ler e escrever
27. 1º ano do Ensino Fundamental (1o grau ou Primário) - antigo pré
28. 2º ano do Ensino Fundamental (1o grau ou Primário) – antiga 1ª. Série
29. 3º ano do Ensino Fundamental (1o grau ou Primário) – antiga 2ª. Série
30. 4º ano do Ensino Fundamental (1o grau ou Primário) – antiga 3ª. Série
31. 5º ano do Ensino Fundamental ou 1o grau (1ª série do Ginásio) – antiga 4ª. Série
32. 6º. ano do Ensino Fundamental ou 1o grau (2ª série do Ginásio) – antiga 5ª. Série
33. 7º. ano do Ensino Fundamental ou 1o grau (3ª série do Ginásio) – antiga 6ª. Série
34. 8º.ano do Ensino Fundamental ou 1o grau (4ª série do Ginásio) – antiga 7ª. Série
35. 9º.ano do Ensino Fundamental ou 1o grau (4ª série do Ginásio) – antiga 8ª. Série
36. 1ª série do Ensino Médio (2o grau ou Colegial)
37. 2ª série do Ensino Médio (2o grau ou Colegial)
38. 3ª série do Ensino Médio (2o grau ou Colegial)
39. Cursos técnicos de nível médio incompletos
40. Cursos técnicos de nível médio completos
41. Curso superior incompleto
42. Curso superior completo
43. Pós-graduação incompleto
44. Pós-graduação completo
45. Não sabe não respondeu
46. Ainda está estudando (Qual ano?)
47. **Qual o seu endereço? (Anotar se possível, rua, bairro, cep)**
48. **Há quanto tempo o(a) Sr.(a) mora neste mesmo domicílio?**
49. **Onde o(a) Sr.(a) nasceu?**
50. **Quantas pessoas residem com o Sr(a) nesse domicílio?**
51. **O sr(a) tem filhos? Se sim, quantos?**
52. **Atualmente o(a) Sr.(a) exerce alguma atividade seja ela remunerada ou não remunerada de trabalho?**
53. Sim, em atividade
54. Sim, mas afastado por motivo de doença
55. Sim, e também aposentado
56. Não, desempregado
57. Não, aposentado
58. Não, dona de casa
59. Não, pensionista
60. Não, só estudante
61. Outro
62. Não sabe/não respondeu
63. **No seu trabalho principal o(a) Sr.(a) é/era:**
64. Empregado assalariado estatutário ou com carteira profissional assinada
65. Empregado assalariado sem carteira profissional assinada
66. Empregado familiar não remunerado
67. Conta própria ou autônomo com estabelecimento
68. Conta própria ou autônomo sem estabelecimento
69. Empregador com até 5 funcionários fixos
70. Empregador com mais de 5 funcionários fixos
71. Trabalhador sem remuneração
72. Ns/nr
73. **Quais foram os rendimentos totais da sua família no mês passado (somando-se todos os rendimentos possíveis)?**
74. Mas, fazendo um cálculo aproximado, o(a) Sr.(a) diria que a renda média líquida global da família no mês passado se situa: Inferior a 1 salário-mínimo
75. Entre 1 e 2 salários-mínimos
76. Maior que 2 até 3 salários-mínimos
77. Maior que 3 até 4 salários-mínimos
78. Maior que 4 até 5 salários-mínimos
79. Maior que 5 até 10 salários-mínimos
80. Maior que 10 até 20 salários-mínimos
81. Acima de 20 salários-mínimos
82. Ns/nr - não sabe ou não respondeu

**Encerramento:**

*Essas foram todas as perguntas que eu tinha para você.*

*Muito obrigado por conversar comigo hoje.*

*Há algo mais que você gostaria de compartilhar sobre sua experiência com o MCMV?*

*Você gostaria de receber atualizações sobre o relatório publicado?*

*[Se sim, entraremos em contato por email e Whatsapp compartilhando o relatório final.* *Confirme qual a forma preferida de contato: e-mail ou WhatsApp e obtenha o contato do respodente ]*

*Obrigado pelo seu tempo e pelas informações valiosas!*

**Observações da entrevista (preenchimento obrigatório pelo(a) entrevistador(a))**

Este campo deve ser preenchido logo após a conclusão da entrevista, com calma e atenção, para registrar qualquer informação relevante sobre o processo de coleta de dados.

Instruções:
Relate de forma objetiva se houve intercorrências, dificuldades, interferências ou comportamentos que possam ter influenciado as respostas. Esses registros são importantes para a equipe de pesquisa avaliar a qualidade e a confiabilidade da entrevista.

Exemplos do que pode ser incluído:

- Dificuldade de compreensão por parte do(a) entrevistado(a) em uma ou mais perguntas;
- Participação ou interferência de terceiros durante a entrevista;
- Ambiente ruidoso, distrações, ou interrupções;
- Entrevistado(a) visivelmente desconfortável com algum tema específico;
- Necessidade de interromper e retomar a entrevista;
- Comportamentos que possam indicar hesitação, desinteresse ou respostas forçadas.

Espaço para preenchimento:

**Roteiro de Entrevista Semiestruturada:**
**Stakeholders/Atores Chave/Agentes (ONGs, Instituições Governamentais, Formuladores de Políticas)**

**Introdução:**

Obrigado por concordar em falar comigo hoje. Este ainda é um bom momento para conversar?

*[Se necessário, reagende para um momento em que a pessoa não esteja com pressa.]*

O objetivo desta entrevista é coletar informações sobre o programa habitacional Minha Casa, Minha Vida (MCMV) na perspectiva de formuladores de políticas, ONGs e instituições envolvidas em habitação, planejamento urbano e sustentabilidade. A equipe de pesquisa enviou algumas informações sobre nosso estudo e o termo de consentimento para sua participação. Você recebeu essas informações?

*[Se não, reenvie por e-mail ou outro meio de preferencia.]*

*[Se sim, ainda ofereça um resumo de 1-2 minutos das informações do e-mail*

Como mencionamos anteriormente, suas respostas hoje são confidenciais e não serão usadas de nenhuma forma para identificá-lo(a), sua equipe ou organização. Lembrando que não existem respostas certas ou erradas e nós gostaríamos de saber sua opinião sobre as particularidades do programa MCMV. Você não será identificado(a) em nenhum relatório. Estamos conversando com diversos atores e agentes chave para identificar principais desafios e oportunidades relacionados ao MCMV, incluindo seu impacto na resiliência climática, saúde e desenvolvimento urbano. Suas contribuições serão fundamentais para nos ajudar a formular recomendações baseadas em evidências para melhorar as políticas habitacionais e os esforços de sustentabilidade no Brasil.
Gostaríamos de gravar esta entrevista para fins de anotação e transcrição, mas as gravações não serão utilizadas para nenhum outro propósito e serão destruídas em até 6 meses. Está de acordo?

*[Se sim]: Obrigado. Vou iniciar a gravação agora.*

*[Se não]: Tudo bem, obrigado por me avisar. Farei anotações por escrito, mas garantirei que tudo permaneça anônimo.*

Você tem alguma dúvida antes de começarmos?

**Questionário de identificação e fatores sociais/individuais**

Antes de iniciarmos o gostaríamos de perguntar algumas características individuais apenas para identificação dos agentes-chave. Lembrando que todos os seus dados são confidenciais e só serão utilizados para pesquisa.

1. **Qual o seu nome completo?**
2. **Qual a sua data de nascimento? ___/___/_____**
3. **Qual o seu gênero:**
4. Masculino
5. Feminino
6. Outro (Qual?)
7. Prefiro não dizer
8. **Qual a sua cor ou raça?**
9. Branca
10. Preta
11. Amarela
12. Parda
13. Indígena
14. Outra (Qual?)
15. Não sabe/não respondeu
16. **Qual organização/empresa/fundação você trabalha?**
17. **Qual seu municipio e estado (vinculado ao trabalho)?**
18. **Qual o seu interesse/relação com o programa MCMV?**
19. **Políticas e Sistemas Sociais**

Considerando esta definição do Ministério das Cidades (2023):

O Programa Minha Casa, Minha Vida (MCMV) é uma iniciativa habitacional do governo federal do Brasil, criada em março de 2009. Gerenciado pelo Ministério das Cidades, o programa oferece subsídios e taxas de juros reduzidas para tornar mais acessível a aquisição de moradias populares, com o objetivo de combater o déficit habitacional no País. Desde a sua criação, o programa já entregou mais de 6 milhões de habitações.

1. ***Qual é o papel da sua organização no programa MCMV?***

*Se possível, explore: “Você pode me contar mais sobre como sua organização está envolvida em políticas habitacionais ou no MCMV?”*

*Se possível, explore: “Em quais projetos ou iniciativas específicos você trabalhou relacionados ao MCMV?”*

1. ***As políticas federais e locais impactam o planejamento e a execução dos empreendimentos do MCMV? Se sim, de que forma?***

*Se possível, explore: “Que tipo de mudanças afetaram recentemente o programa (políticas, econômicas, recursos)?”*

Considerando estas definições:

[Definição de equidade: *Equidade refere-se à garantia de que todos os indivíduos tenham acesso justo e igualitário a oportunidades, recursos e direitos, buscando corrigir desigualdades estruturais para promover justiça social.*]

[Definição de sustentabilidade: *Sustentabilidade refere-se ao desenvolvimento de habitações que atendam às necessidades das gerações atuais sem comprometer os recursos e as oportunidades para as gerações futuras.*]

Ambos os conceitos — equidade e sustentabilidade — estão interligados, pois envolvem a promoção de condições sociais, econômicas, culturais e ambientais justas e responsáveis, garantindo o bem-estar das gerações atuais e futuras.

1. ***Quais são as principais barreiras para construir e operar habitações sociais de forma sustentável e equitativa no Brasil?***

*Se possível, explore: Você observou alguma iniciativa governamental para reduzir essas barreiras?*

*Se possível, explore: Existem novos desafios emergentes que podem impactar ainda mais o acesso à habitação social?*

*Se possível, explore: Você conhece políticas ou programas que apoiem o desenvolvimento sustentável de habitação social?*

*Se possível, explore: Existem novos desafios surgindo que podem dificultar a sustentabilidade na habitação social?*

1. ***Como as políticas públicas podem melhorar as condições de vida saudável dos moradores do MCMV?***
2. **Contexto Planetário & Global**

Gostaríamos de conversar agora sobre como o programa MCMV se conecta com esses temas. Para isso, segue a seguinte definição:

[Definição de resiliência climática segundo o IPCC *(IPCC, AR6 WGII Glossary, 2022)*: *Resiliência climática refere-se à a capacidade de sistemas sociais, econômicos e ecossistemas de lidar com um evento, tendência ou perturbação climática, incluindo as habilidades de reorganizar-se e aprender para manter suas funções essenciais. Portanto, é a habilidade de resistir, adaptar‑se e se recuperar dos impactos das mudanças climáticas]*

1. ***Quais estratégias específicas do programa MCMV buscam enfrentar riscos climáticos, como calor extremo, inundações ou secas?***

   *Se necessário defina: [Definição de estratégias: Estratégias englobam os processos ou métodos sistemáticos, técnicas, atividades e recursos utilizados para alcançar objetivos e, em última instância, as metas. Elas fornecem o “como” para a implementação eficaz de um plano, política ou intervenção.]*

*Se necessário defina: [Definição de políticas públicas: Políticas públicas são um conjunto de ações governamentais, método ou curso de ação por um governo para guiar e determinar as decisões presentes e futuras. Elas devem ser informadas por evidências, claras, específicas, mensuráveis, dentro do orçamento e com objetivos definidos.]*

1. ***Pensando de forma mais ampla: existem outras estratégias (de outros programas, projetos ou políticas) que você acredita que poderiam ser utilizadas para enfrentar esses riscos no contexto do MCMV?***

*Se possível, explore: “*Quais estratégias de adaptação e mitigação às mudanças climáticas têm sido ou poderiam ser adotadas nos empreendimentos do MCMV?

*Se possível, explore: “*Há diretrizes ou incentivos públicos para conforto ambiental passivo ou para adequação climática dos projetos aos contextos locais?

*Se possível, explore: “*Você pode dar exemplos de estratégias específicas que estão sendo aplicadas?

1. ***Na sua visão, existem lacunas no MCMV para lidar com riscos climáticos? Que desafios ou dificuldades você enxerga?***
2. ***Quais estratégias têm sido utilizadas para integrar infraestrutura verde, como energia renovável, sistemas de eficiência hídrica ou materiais sustentáveis, nos empreendimentos do MCMV?***

*Se possível, explore: “Quais tipos de infraestrutura verde têm sido mais eficazes nos empreendimentos do MCMV?”*

*Se possível, explore: “Existem barreiras regulatórias ou financeiras específicas que impedem uma adoção maior de soluções verdes?”*

1. ***Você conhece políticas em nível federal, estadual ou local em vigor para mitigar a degradação ambiental associada a empreendimentos habitacionais de grande escala?***

*Se possível, explore: “Que medidas foram tomadas para minimizar o desmatamento, a poluição da água ou conflitos de uso da terra?”*

*Se possível, explore: “São exigidos estudos de impacto ambiental para os projetos do MCMV?”*

1. **Comunidade & Organização (Nível dos Empreendimentos MCMV)**
2. ***Como os locais dos empreendimentos MCMV são selecionados e quais fatores influenciam essa escolha?***

*Se possível, explore: “Quais são os principais vieses nesse processo?”*

1. ***Quais são os principais desafios que os empreendimentos do MCMV enfrentam em termos de infraestrutura e oferta de serviços? Quais são os mais importantes? Quais são os mais desafiadores?***

*Se possível, explore: “Quais são as questões de infraestrutura mais urgentes nos empreendimentos do MCMV?”*

*Se possível, explore: “Há esforços em andamento para melhorar os serviços públicos (por exemplo, transporte, saúde, saneamento) nas comunidades do MCMV?”*

*Explorar: Há esforços para aumentar áreas verdes e arborização urbana nas comunidades do MCMV?*

*Explorar: Há esforços para aumentar o acesso e qualidade de espaços públicos abertos, opções para práticas de atividade física e lazer, presença de grandes estações de transporte público e uso misto do solo?*

Agora gostaríamos de saber um pouco mais sobre as estratégias que têm sido usadas para melhorar as condições de vida dos moradores do MCMV.

1. ***Agora, irei listar 8 áreas principais para esta pergunta. Quais são as estratégias que você conhece ou considera eficazes para melhorar o programa MCMV:***
   - *[Quais são as estratégias para]* O acesso ao transporte público
   - *[Quais são as estratégias para]* O acesso a oportunidades de trabalho
   - *[Quais são as estratégias para]* A saúde
   - *[Quais são as estratégias para]* A educação
   - *[Quais são as estratégias para]* A segurança pública
   - *[Quais são as estratégias para]* Áreas para a prática da atividade física (ex. parques, praças...)
   - *[Quais são as estratégias para]* O acesso a espaços verdes e áreas de lazer
   - Tem algo mais que você acha importante e que não foi mencionado?
2. **Laços e relações sociais**

Agora queremos conversar um pouco sobre as comunidades que se formam nos bairros do programa Minha Casa Minha Vida.

[Definição de resiliência comunitária: *Resiliência comunitária é a capacidade de uma comunidade de se organizar, se apoiar mutuamente e se adaptar para enfrentar dificuldades, crises ou mudanças, fortalecendo o bem-estar coletivo.*]

1. ***Qual é o papel dos laços e relações sociais entre os moradores e as organizações locais para fortalecer a resiliência das comunidades do MCMV? (por exemplo, relações entre vizinhos, moradores do conjunto habitacional como um todo, associações de bairro, atividades para a comunidade)***
2. ***Como as comunidades do MCMV se organizam para lidar com dificuldades do dia a dia relacionadas ao bairro onde vivem, como problemas de transporte, saneamento ou segurança pública?***
3. **Fatores Individuais**
4. ***De forma geral, como você avalia a saúde geral da população residente nos empreendimentos do MCMV? O que você acha que poderia ser feito para melhorar a saúde desses moradores?***
5. ***Você acredita que o programa MCMV, de alguma forma, afeta comportamentos relacionados à saúde dos moradores?***

Queremos entender melhor como questões de **equidade** e questões **estruturais** que impactam a saúde e as oportunidades dos moradores do programa MCMV.

**Sobre equidade e oportunidades:**

1. ***Considerando o perfil dos moradores do MCMV (idade, etnia, renda, escolaridade, emprego, etc.), como o acesso a oportunidades de saúde e bem-estar difere de moradores de outras áreas da cidade?***

**Sobre fatores estruturais:**

1. ***Você acredita que aspectos como segregação socioespacial, justiça ambiental ou racismo estrutural e ambiental afetam a saúde e o bem-estar dos moradores do MCMV? Sim ou não, de que forma?***

**Encerramento:**

*Essas foram todas as perguntas que eu tinha para você.

Muito obrigado por conversar comigo hoje.*

*Há algo mais que você gostaria de compartilhar sobre sua experiência com o MCMV?*

*Você gostaria de receber atualizações sobre o relatório publicado?*

*Você Poderia indicar outras pessoas‑chave que atuem com o MCMV — especialmente nas áreas de resiliência climática, saúde ou desenvolvimento urbano — que possamos convidar para esta entrevista?*

*Obrigado pelo seu tempo e pelas informações valiosas!*
